# Supplementary material for: Quantitative assessment of background parenchymal enhancement in breast MRI predicts response to risk-reducing salpingo-oophorectomy: preliminary evaluation in a cohort of BRCA1/2 mutation carriers
Source: Springer Nature journal article supplement (doi:10.1186/s13058-015-0577-0), 2015-05-18
Supplement: MOESM1 [file 9781442]

## Determination of an optimal parameter value for BPE quantification using leave-one-out cross validation

We have tested the leave-one-out cross validation (LOOCV) to determine optimal cut-off value for parameter  $R\%_{\text{cutoff}}$ , in which AUCs were computed based on LOOCV using before and after-RRSO relative BPE changes, derived across the same range of the  $R\%_{\text{cutoff}}$  values (from 0% to 100%). Based on the most significant measure (i.e., BPE%, according to the ANOVA test in Table 1), we again found that  $R\%_{\text{cutoff}}=30\%$  yielded the highest cross-validated AUC (see below Figure S1). This finding of  $R\%_{\text{cutoff}}=30\%$  is consistent with what we have observed from the analyses using the whole dataset, as reported in Figure 3.

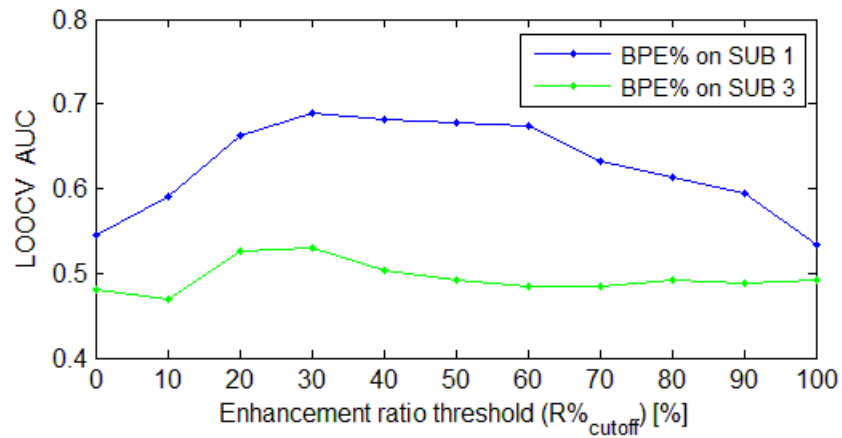

**Figure S1:** The ROC AUCs (based on the leave-one-out cross validation) of the predictive performance when using relative changes in the different BPE% measures across the entire range of  $R\%_{\text{cutoff}}$  values to predict women who developed breast cancer post-RRSO.
